# Supplementary material for: Identification of powdery mildew resistance QTL in strawberry (Fragaria × ananassa)
Source: PubMed Central journal article supplement (PMC6096635; doi:10.1007/s00122-018-3128-0), 2018-07-03

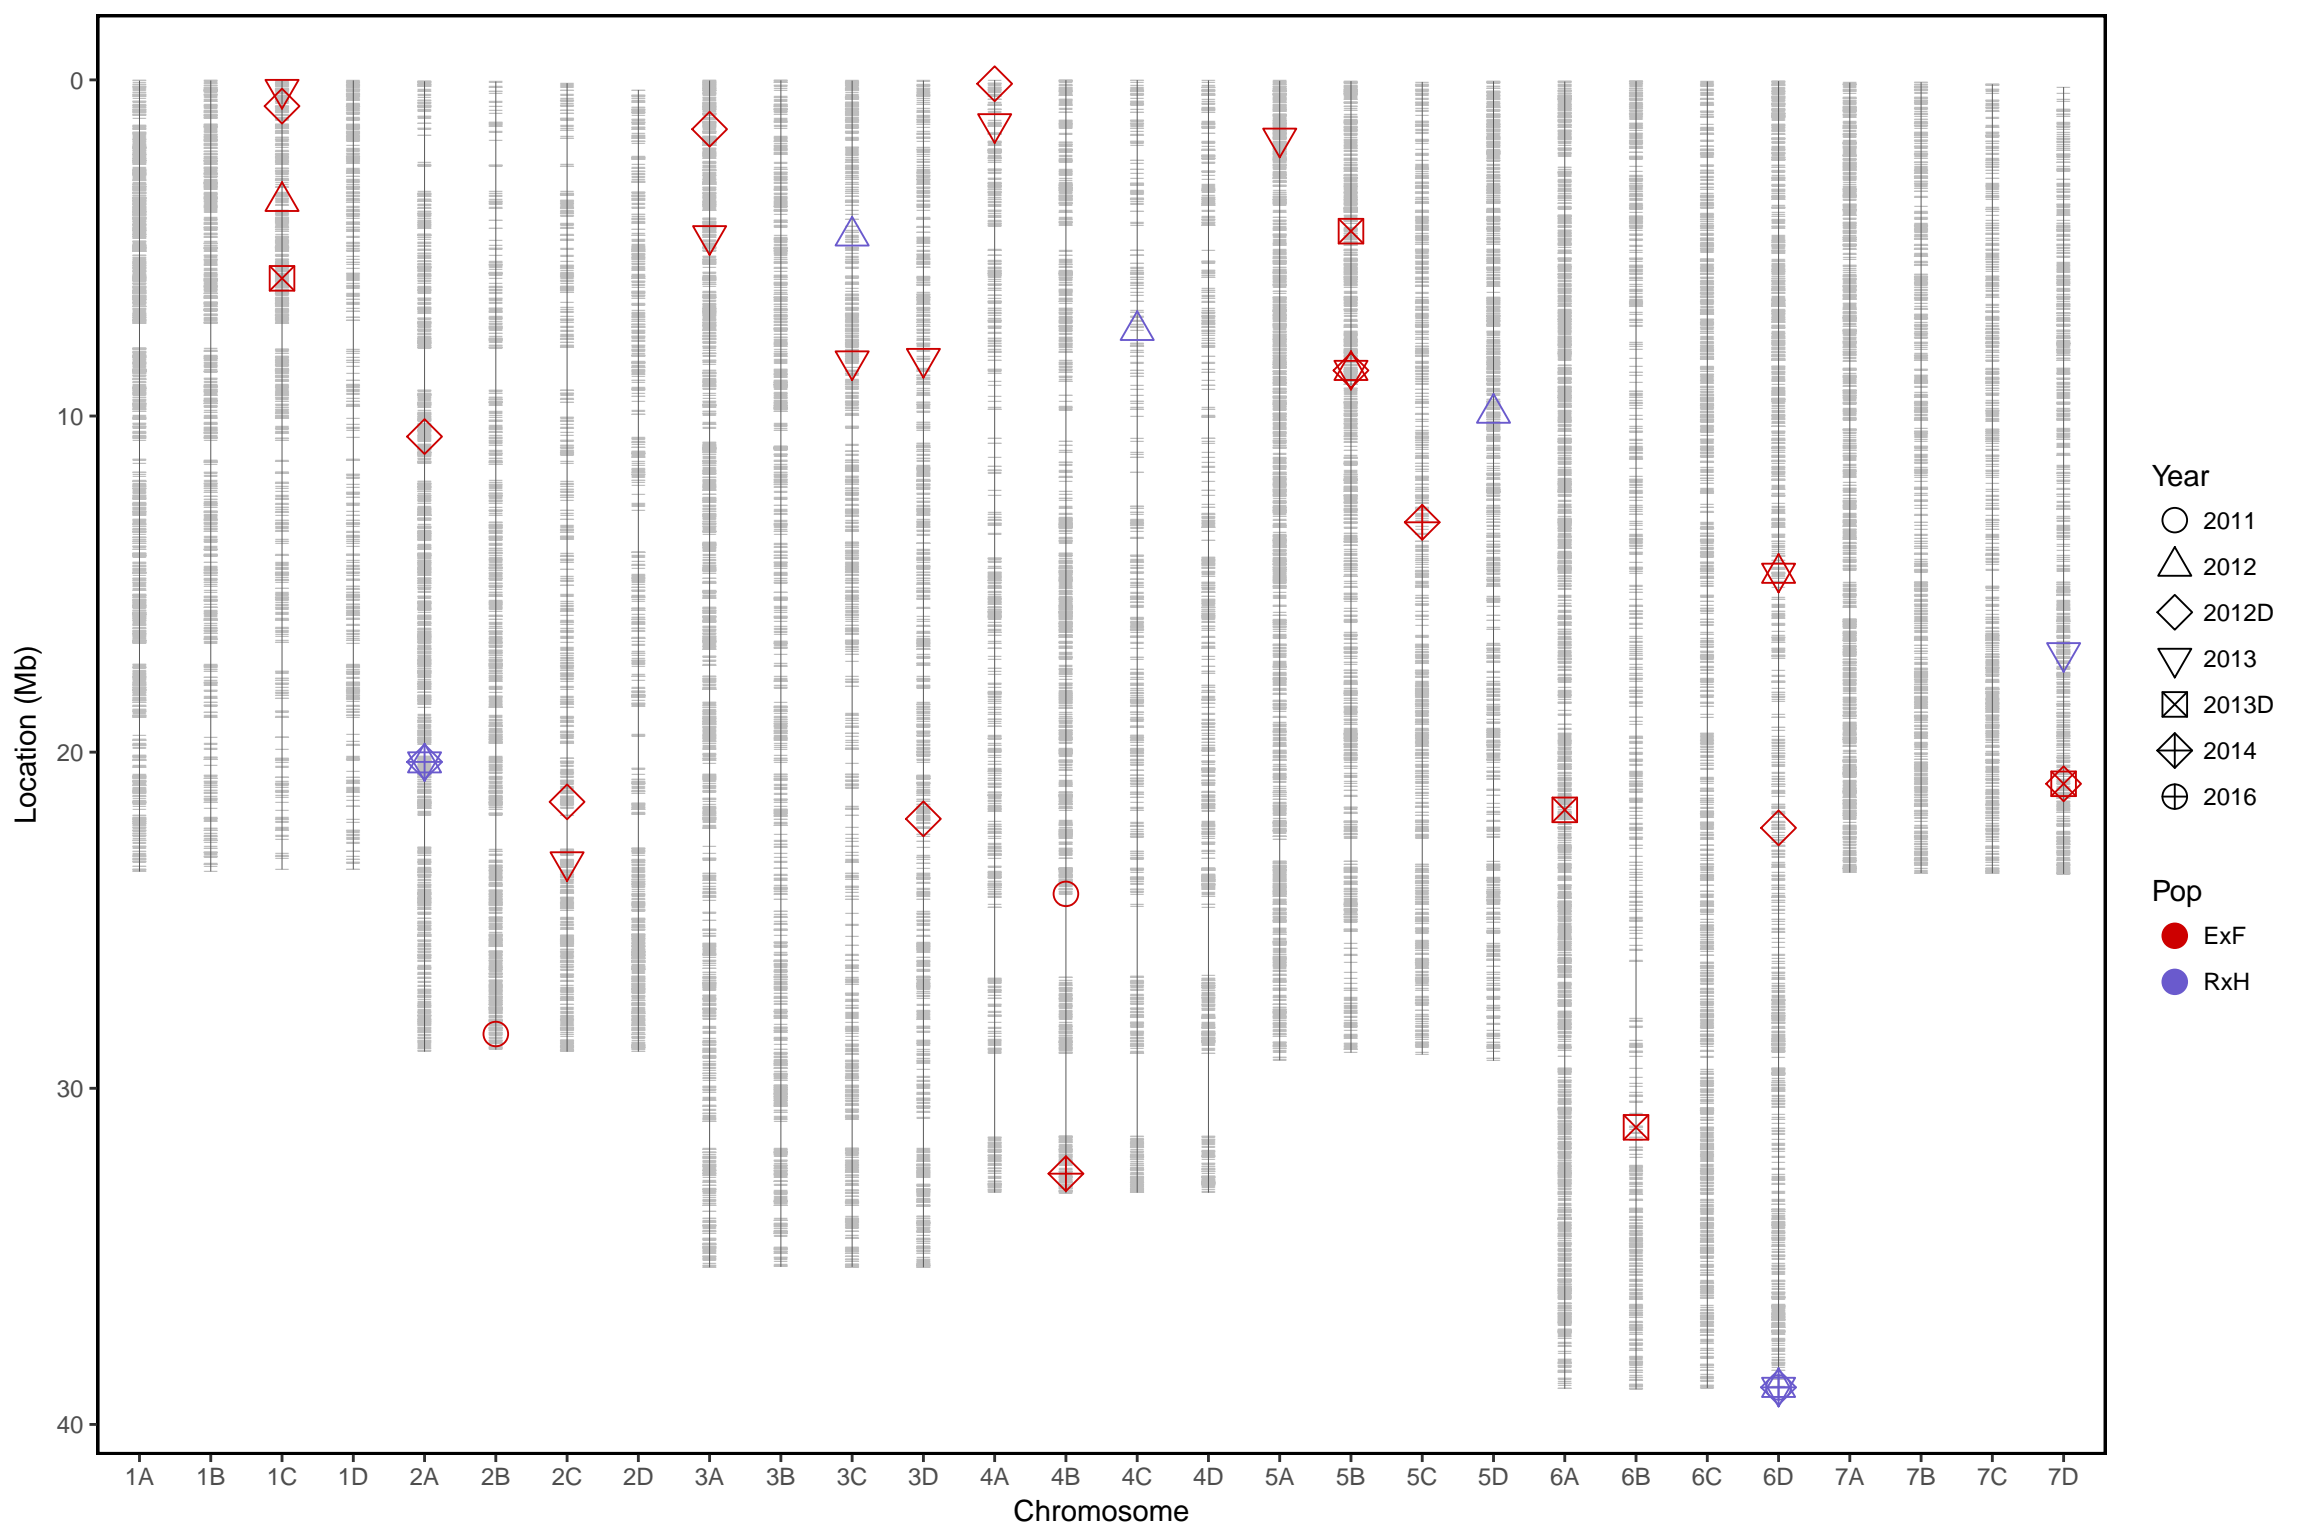

Supplement: 122_2018_3128_MOESM1_ESM.pdf [file 122_2018_3128_MOESM1_ESM.pdf]
