# Supplementary material for: Identification of powdery mildew resistance QTL in strawberry (Fragaria × ananassa)
Source: PubMed Central journal article supplement (PMC6096635; doi:10.1007/s00122-018-3128-0), 2018-07-03
Supplement: 122_2018_3128_MOESM3_ESM.pdf [file 122_2018_3128_MOESM3_ESM.pdf]

**Supplementary Table 1** Focal single nucleotide polymorphisms (SNP) linked with each quantitative trait loci associated with strawberry powdery mildew disease resistance identified through the Kruskal-Wallis analysis. Individual analysis is conducted for each phenotyping event. Dark grey shading highlights incidences where identical SNP have been identified. Light grey shading denotes SNP which represent the same QTL.

| LG | Marker name   | Position (Mb) | H    | sig   | Parent          | Year  |
|----|---------------|---------------|------|-------|-----------------|-------|
| 1C | Affx.88811774 | 3.6           | 21.1 | ***** | Emily           | 2012a |
| 1C | Affx.88810959 | 0.8           | 24.3 | ***** | Emily           | 2012b |
| 1C | Affx.88809498 | 0.3           | 19.8 | ***** | Emily           | 2013a |
| 1C | Affx.88813625 | 5.9           | 17.6 | ****  | Emily           | 2013b |
| 2A | Affx.88819993 | 10.6          | 6.8  | **    | Fenella         | 2012b |
| 2A | Affx.88826282 | 20.3          | 10.8 | ***   | Hapil           | 2012  |
| 2A | Affx.88826254 | 20.3          | 14.0 | ***   | Hapil           | 2013  |
| 2A | Affx.88826254 | 20.3          | 20.6 | ***** | Hapil           | 2014  |
| 2B | Affx.88830297 | 28.4          | 9.4  | **    | Emily           | 2011  |
| 2C | Affx.88826973 | 21.5          | 15.6 | ****  | Emily           | 2012b |
| 2C | Affx.88879338 | 23.3          | 12.2 | ***   | Emily           | 2013a |
| 3A | Affx.88831545 | 1.5           | 5.4  | *     | Fenella         | 2012b |
| 3A | Affx.88834579 | 4.6           | 7.1  | **    | Fenella         | 2013a |
| 3C | Affx.88835425 | 8.4           | 15.3 | ****  | Fenella         | 2013a |
| 3C | Affx.88834576 | 4.6           | 7.7  | **    | Hapil           | 2012  |
| 3D | Affx.88846435 | 22.0          | 6.0  | *     | Fenella         | 2012b |
| 3D | Affx.88835461 | 8.3           | 14.6 | ***   | Emily           | 2013a |
| 4A | Affx.88846914 | 0.1           | 10.3 | **    | Emily           | 2012b |
| 4A | Affx.88846745 | 1.3           | 10.6 | **    | Emily           | 2013a |
| 4B | Affx.88854428 | 24.2          | 10.4 | **    | Emily           | 2011  |
| 4B | Affx.88851752 | 32.5          | 10.2 | *     | Emily & Fenella | 2014  |
| 4C | Affx.88848483 | 7.5           | 5.5  | *     | Hapil           | 2012  |
| 5A | Affx.88859525 | 1.7           | 11.2 | ***   | Fenella         | 2013a |
| 5B | Affx.88862333 | 8.6           | 17.8 | ****  | Fenella         | 2012a |
| 5B | Affx.88862333 | 8.6           | 15.1 | ***   | Fenella         | 2012b |
| 5B | Affx.88862333 | 8.6           | 8.9  | **    | Fenella         | 2013a |
| 5B | Affx.88861172 | 4.5           | 20.5 | ***** | Fenella         | 2013b |
| 5C | Affx.88864901 | 13.2          | 8.3  | **    | Fenella         | 2014  |
| 5D | Affx.88864140 | 9.9           | 11.3 | ***   | Hapil           | 2012  |
| 6A | Affx.88882922 | 21.7          | 7.0  | **    | Emily           | 2013b |
| 6B | Affx.88880140 | 31.2          | 9.1  | **    | Emily           | 2013b |
| 6D | Affx.88880958 | 14.7          | 9.5  | **    | Fenella         | 2012a |
| 6D | Affx.88880958 | 14.7          | 9.1  | **    | Fenella         | 2013a |
| 6D | Affx.88883211 | 22.3          | 7.8  | **    | Fenella         | 2012b |
| 6D | Affx.88904022 | 38.9          | 23.0 | ***** | Redgauntlet     | 2012  |
| 6D | Affx.88904022 | 38.9          | 12.8 | ***   | Redgauntlet     | 2013  |
| 6D | Affx.88904022 | 38.9          | 15.9 | ****  | Redgauntlet     | 2014  |
| 6D | Affx.88904022 | 38.9          | 13.7 | ***   | Redgauntlet     | 2016  |
| 7D | Affx.88898584 | 17.0          | 12.5 | ***   | Hapil           | 2013  |
| 7D | Affx.88902178 | 20.9          | 21.2 | ***** | Emily           | 2012b |
| 7D | Affx.88902178 | 20.9          | 19.1 | ****  | Emily           | 2013b |
